# Supplementary material for: Measurement Report: Polycyclic aromatic hydrocarbons (PAHs) and their alkylated (RPAHs), nitrated (NPAHs) and oxygenated (OPAHs) derivatives in the global marine atmosphere: occurrence, spatial variations, and source apportionment
Source: Copernicus journal article supplement (doi:10.5194/egusphere-2024-3740), 2025-02-03

## ***Supplementary Information***

**Title:** Polycyclic aromatic hydrocarbons (PAHs) and their alkylated (RPAHs), nitrated (NPAHs) and oxygenated (OPAHs) derivatives in the global marine atmosphere: occurrence, spatial variations, and source apportionment

**Authors:** Rui Li<sup>a, b</sup>, Yubing Shen<sup>a</sup>, Yining Gao<sup>a</sup>, Yumeng Shao<sup>a</sup>, Ziwei Yao<sup>c</sup>, Qian Liu<sup>c</sup>, Xing Liu<sup>c, \*</sup>, Guitao Shi<sup>a, \*</sup>

**Affiliations:** <sup>a</sup> *Key Laboratory of Geographic Information Science of the Ministry of Education, School of Geographic Sciences, East China Normal University, Shanghai, 200241, PR China*

<sup>b</sup> *Institute of Eco-Chongming (IEC), 20 Cuiniao Road, Chenjia Town, Chongming District, Shanghai, 202162, China*

<sup>c</sup> *State Environmental Protection Key Laboratory of Coastal Ecosystem, National Marine Environmental Monitoring Center, Dalian 116023, China*

**\* Corresponding author**

Prof. Liu (xliu@nmemc.org.cn) and Prof. Shi (gtshi@geo.ecnu.edu.cn)

Number of pages: 9

Number of figures: 5

Number of tables: 1

### **Text S1 Instrumental analysis**

A gas chromatograph (Agilent 7890B GC) coupled with the mass spectrometer (Agilent 5977B MS) was employed to determine the concentrations of PAH, NPAH, and OPAH species. Capillary column DB-5MS was used to analyze PAH concentrations. The gas chromatograph oven temperature was programmed to kept at 70 °C for 1 min, to 260 °C at the rate of 10 °C/min, and then increased to 300 °C at the rate of 5 °C/min and remained the same temperature for 5 min. The carrier gas is high purity helium.

Both of NPAHs and OPAHs concentrations were determined using a DB-5MS capillary column in a negative chemical ionization mode. The gas chromatograph oven temperature was programmed to increase from 40 °C to 150 °C at the rate of 15 °C/min, to 300 °C at the rate of 5 °C/min, and then kept at the same temperature for 15 min. The carrier gas and reagent gas were high purity helium and high purity methane, respectively.

RPAH was analyzed using a GC (7890N GC, Agilent, Santa Clara, USA) equipped with a deactivated fused silica guard column (5 m, Agilent, Santa Clara, USA) followed by a 30 m × 0.25 mm × 0.25 μm fused silica column (DB-5MS, J&W, Santa Clara, USA). The gas chromatograph oven program was set to 80 °C as the initial temperature, and programmed to increase at a rate of 21°C/min to 150 °C. Then, the temperature was further programmed to increase at the rate of 5 °C/min to 300 °C. Finally, the air temperature kept at 300 °C for 20 min.

**Table S1** Limits of detection (LOD) and recoveries of parent PAHs and derivatives.

| Compounds                     | Compound class | LOD (ng/m <sup>3</sup> ) | Recovery (%) |
|-------------------------------|----------------|--------------------------|--------------|
| Nap                           | PAHs           | 0.10                     | 81           |
| Acy                           | PAHs           | 0.09                     | 80           |
| Ace                           | PAHs           | 0.10                     | 82           |
| Flu                           | PAHs           | 0.13                     | 86           |
| Phe                           | PAHs           | 0.11                     | 80           |
| Ant                           | PAHs           | 0.02                     | 80           |
| Fluoran                       | PAHs           | 0.03                     | 85           |
| Pyr                           | PAHs           | 0.10                     | 84           |
| BaA                           | PAHs           | 0.04                     | 83           |
| CT                            | PAHs           | 0.25                     | 85           |
| BbF                           | PAHs           | 0.34                     | 89           |
| BkF                           | PAHs           | 0.11                     | 93           |
| BeP                           | PAHs           | 0.28                     | 92           |
| BaP                           | PAHs           | 0.09                     | 95           |
| Per                           | PAHs           | 0.02                     | 83           |
| IP                            | PAHs           | 0.14                     | 86           |
| BghiP                         | PAHs           | 0.02                     | 88           |
| DBA                           | PAHs           | 0.10                     | 89           |
| 1,4-Naphthoquinone            | OPAHs          | 0.01                     | 85           |
| 1-Naphthaldehyd               | OPAHs          | 0.03                     | 81           |
| 1-Ancenaphthenaquinone        | OPAHs          | 0.01                     | 91           |
| 9-Fluorenone                  | OPAHs          | 0.01                     | 80           |
| Ancenaphthenaquinone          | OPAHs          | 0.03                     | 88           |
| Anthraquinone                 | OPAHs          | 0.01                     | 97           |
| Benzanthrone                  | OPAHs          | 0.01                     | 98           |
| Benzo(a)anthracene-7,12-dione | OPAHs          | 0.02                     | 119          |
| 1,4-Chysenequione             | OPAHs          | 0.37                     | 133          |
| 5,12-Naphthacenequione        | OPAHs          | 0.04                     | 113          |
| 6H-Benzo(cd)pyrene-6-one      | OPAHs          | 0.02                     | 137          |
| 2-Methylnaphthalene           | RPAHs          | 0.01                     | 86           |
| 1-Methylnaphthalene           | RPAHs          | 0.02                     | 88           |
| 2,6-Dimethylnaphthalene       | RPAHs          | 0.02                     | 85           |
| 1,3-Dimethylnaphthalene       | RPAHs          | 0.03                     | 92           |
| 1,6,7-Trimethylnaphthalene    | RPAHs          | 0.02                     | 83           |
| 2-Methylanthracene            | RPAHs          | 0.01                     | 82           |
| 1-Methylphenanthrene          | RPAHs          | 0.01                     | 89           |
| 1-methylanthracene            | RPAHs          | 0.01                     | 92           |
| 1-Methylfluoranthene          | RPAHs          | 0.04                     | 91           |
| 1-Nitronaphthalene            | NPAHs          | 0.02                     | 87           |
| 2-Nitronaphthalene            | NPAHs          | 0.03                     | 83           |
| 1,3-Dinitronaphthalene        | NPAHs          | 0.03                     | 82           |
| 5-Nitroacenaphthene           | NPAHs          | 0.01                     | 94           |

|                        |       |      |    |
|------------------------|-------|------|----|
| 2-Nitrofluorene        | NPAHs | 0.04 | 95 |
| 9-Nitroanthracene      | NPAHs | 0.01 | 92 |
| 1,8-Dinitronaphthalene | NPAHs | 0.01 | 90 |

---

Figure S1 The spatial distributions of OPAH species in the global marine aerosols (Unit:  $\text{pg}/\text{m}^3$ ).

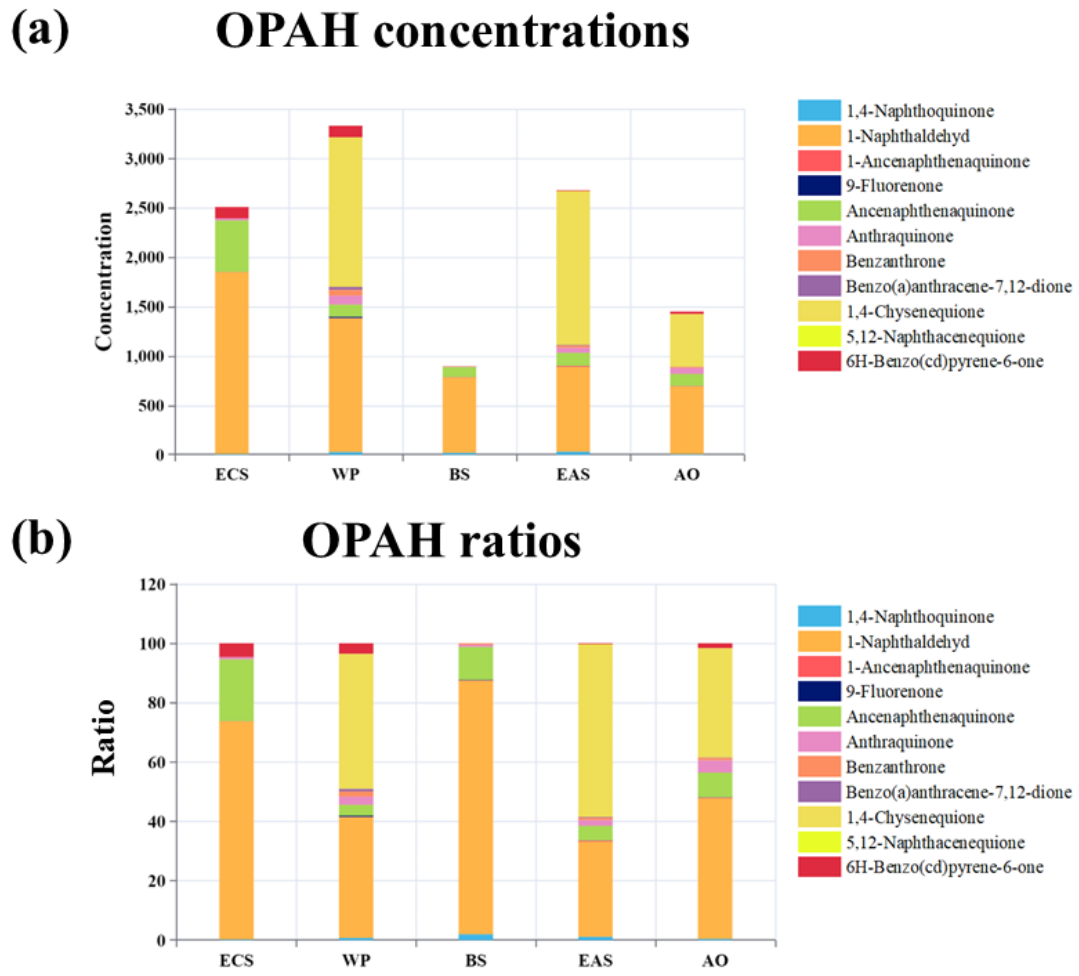

**Figure S2** Global simulated wildfire-related benzene concentrations in 2019 based on GEOS-Chem model (Unit: ppb).

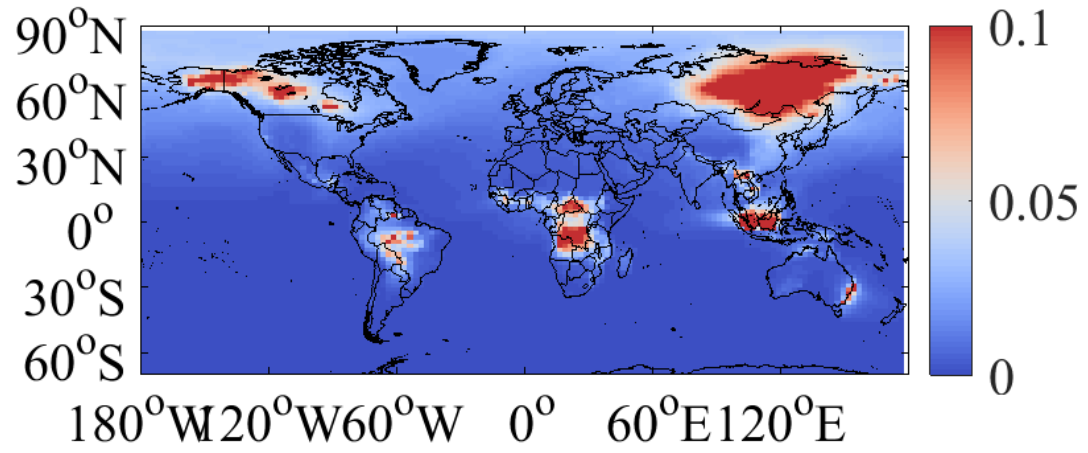

**Figure S3** The global simulated ambient concentrations of O<sub>3</sub> (Unit:  $\mu\text{g}/\text{m}^3$ ) and OH radical (Unit:  $10^{-3}$  ppt) in 2019.

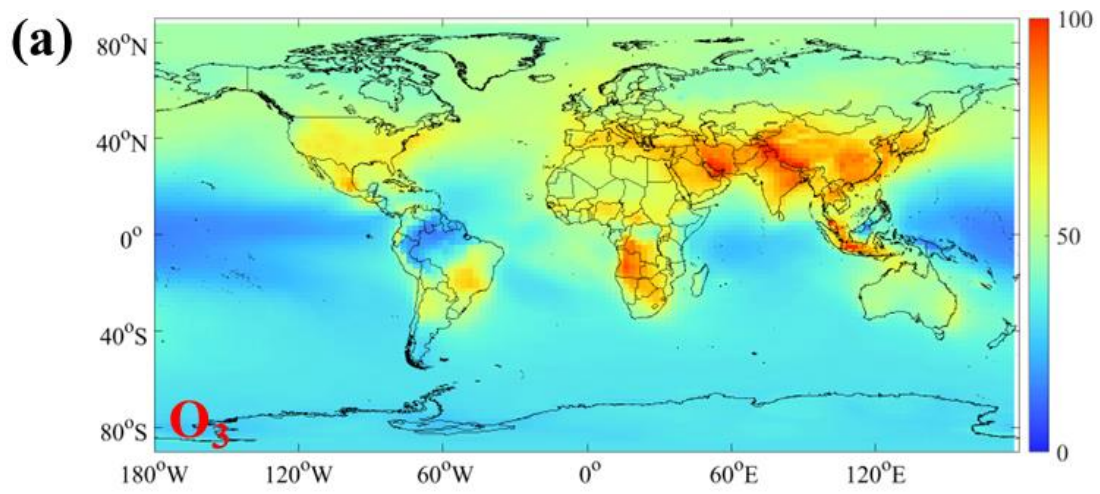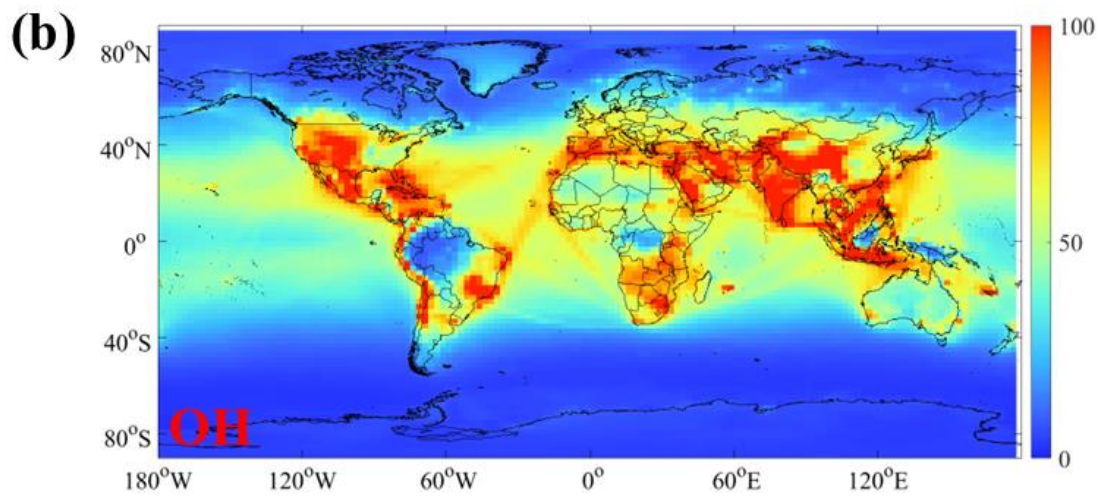

**Figure S4** The spatial distributions of RPAH species in the global marine aerosols (Unit:  $\text{pg}/\text{m}^3$ ).

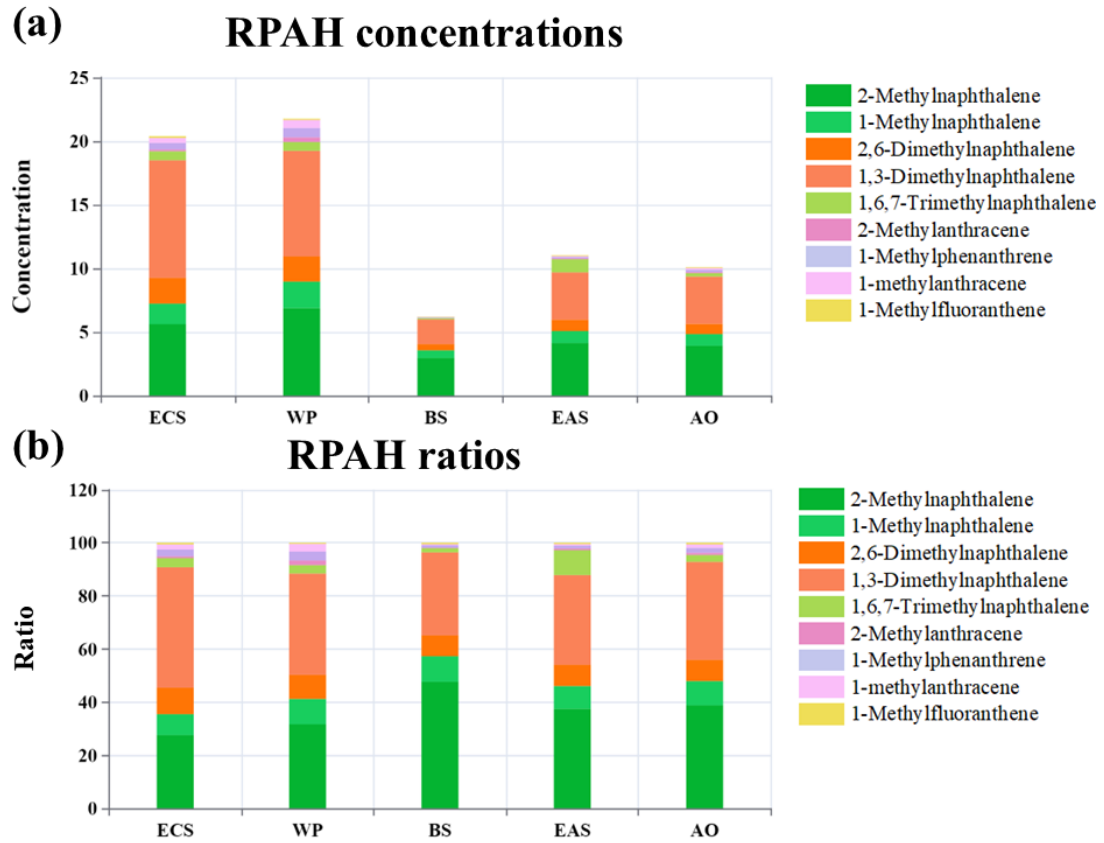



Figure S5 The spatial distributions of NPAH species in the global marine aerosols (Unit:  $\text{pg}/\text{m}^3$ ).

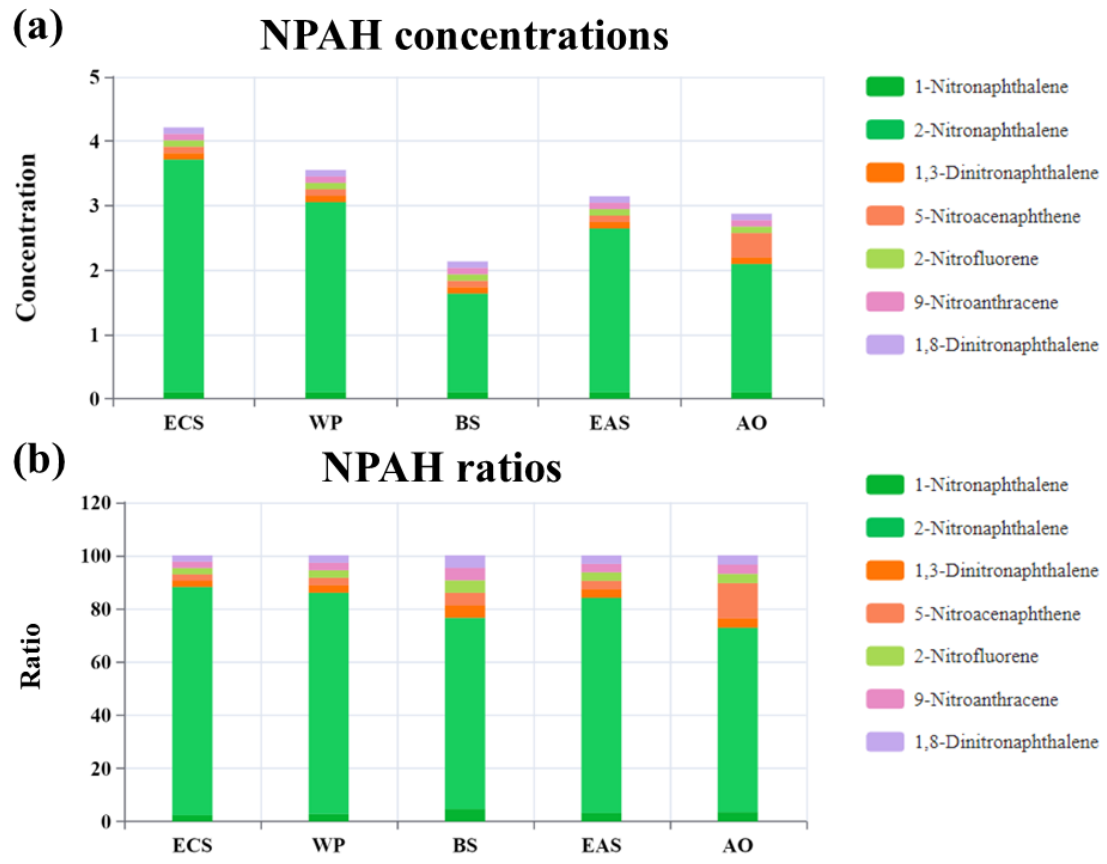

Supplement: Supplementary file 1 [file egusphere-2024-3740-supplement.pdf]
